# Supplementary material
Source: HighWire-hosted journal article supplement (https://bmjopen.bmj.com/content/11/2/e043371)
Supplement: inline-supplementary-material-4 [file inline-supplementary-material-4.pdf]

### Ethical Approval of the Ethics committee of the Zhongshan Ophthalmic Center, Sun Yat-sen University

|                                                 |                                                                                                                                                                                                                                                                                                                                                                                                               |                        |                                                                                                    |
|-------------------------------------------------|---------------------------------------------------------------------------------------------------------------------------------------------------------------------------------------------------------------------------------------------------------------------------------------------------------------------------------------------------------------------------------------------------------------|------------------------|----------------------------------------------------------------------------------------------------|
| ID                                              | 2019KYPJ108                                                                                                                                                                                                                                                                                                                                                                                                   |                        |                                                                                                    |
| Title                                           | Micro-invasive pars-plana vitrectomy versus pan-retinal photocoagulation in the treatment of severe non-proliferative diabetic retinopathy: a randomized controlled trial                                                                                                                                                                                                                                     |                        |                                                                                                    |
| Applying unit                                   | Zhongshan Ophthalmic Center, Sun Yat-Sen University                                                                                                                                                                                                                                                                                                                                                           |                        |                                                                                                    |
| Category                                        | <input type="checkbox"/> Drug Test <input type="checkbox"/> Medical Apparatus<br><input checked="" type="checkbox"/> Scientific Research <input type="checkbox"/> Medical Technology                                                                                                                                                                                                                          |                        |                                                                                                    |
| Study setting                                   | Zhongshan Ophthalmic Center, Sun Yat-Sen University                                                                                                                                                                                                                                                                                                                                                           | Principal investigator | Tao Li                                                                                             |
| Approval date                                   | February 28, 2020                                                                                                                                                                                                                                                                                                                                                                                             | Approval location      | Online                                                                                             |
| Drug/Medical Device Registration Classification | Not applicable                                                                                                                                                                                                                                                                                                                                                                                                | Approval mode          | <input type="checkbox"/> Conference approval<br><input checked="" type="checkbox"/> Quick approval |
| Approval committee                              | Weirong Chen , Shasha Pan                                                                                                                                                                                                                                                                                                                                                                                     |                        |                                                                                                    |
| Submit materials                                | 1. Application form for Ethical Approval, 20190618;<br>2. Application report for Ethical Approval, 20190618;<br>3. Summary for study protocol, 20190724;<br>4. Study protocol, Version 1.0, 20190724;<br>5. Consent form, 20190724;<br>6. Case Report Form, 20190724;<br>7. Questionnaire.                                                                                                                    |                        |                                                                                                    |
| Approval opinions                               | According to the tenets of the Declaration of Helsinki, International ethical guidelines for human biomedical research, and Ethical review method of biomedical research involving human which published by Good Clinical Practices, Ethics committee of the Zhongshan Ophthalmic Center approved conducting the clinical trial (Study protocol, Version 1.0, 20190724; Consent form, Version 1.0, 20190724). |                        |                                                                                                    |
| Regularly track review frequency                | Please submit a follow-up review report according to the ethical review workflow requirements of Zhongshan Ophthalmic Center before June 19, 2020.                                                                                                                                                                                                                                                            |                        |                                                                                                    |
| Validity of ethical approval                    | From August 21, 2019 to July 19, 2020 (apply for extension when necessary)                                                                                                                                                                                                                                                                                                                                    |                        |                                                                                                    |
| Contacts                                        | Yanjie Yan                                                                                                                                                                                                                                                                                                                                                                                                    |                        |                                                                                                    |
| Chairman                                        | Xiaofeng Lin                                                                                                                                                                                                                                                                                                                                                                                                  | Telephone              | 020-66610729                                                                                       |
| Ethics committee                                | Ethics committee of the Zhongshan Ophthalmic Center, Sun Yat-sen University                                                                                                                                                                                                                                                                                                                                   |                        |                                                                                                    |
| Date                                            | August 21, 2019                                                                                                                                                                                                                                                                                                                                                                                               |                        |                                                                                                    |
